# Supplementary material for: Consequences of Anabolic-Androgenic Steroid Abuse in Males; Sexual and Reproductive Perspective
Source: PubMed Central journal article supplement — World J Mens Health. 2021 Jun 1;40(2):165–78. doi: 10.5534/wjmh.210021 (PMC8987149; doi:10.5534/wjmh.210021), 2021-06-01
Supplement: wjmh-40-165-s001.pdf [file wjmh-40-165-s001.pdf]

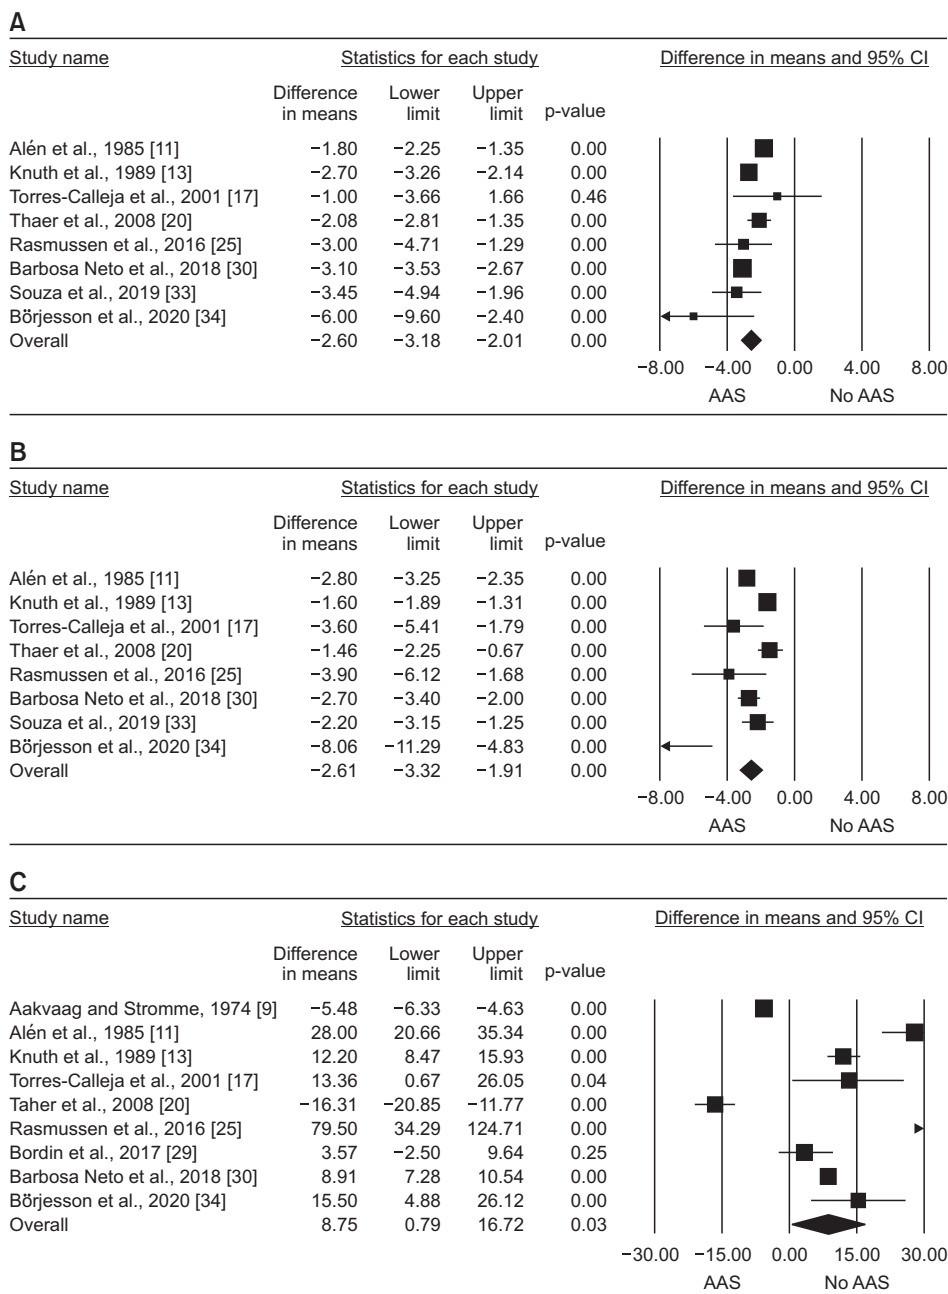

**Supplement Fig. 1.** Weighted differences (with 95% confidence interval [CI]) in Luteinizing hormone (A; mU/mL), follicular stimulating hormone (B; mU/mL), total testosterone (C; nmol/L), total estradiol (D; pmol/L), and sex hormone binding globulin (E; nmol/L) as derived from meta-analysis in men using or not using anabolic androgenic steroids (AAS). Data are reported as mean (95% CI) and as standardized mean (95% CI).

**D**

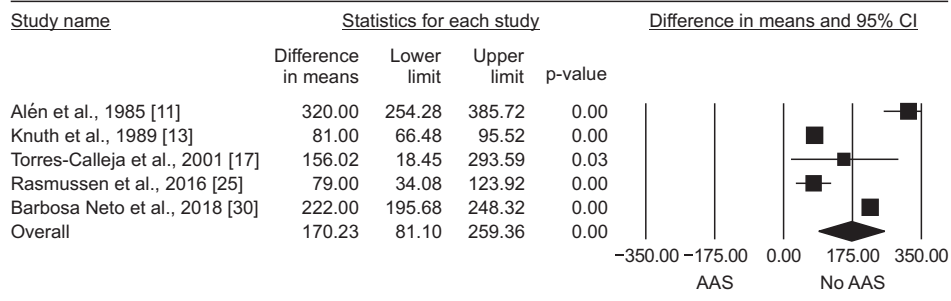

**E**

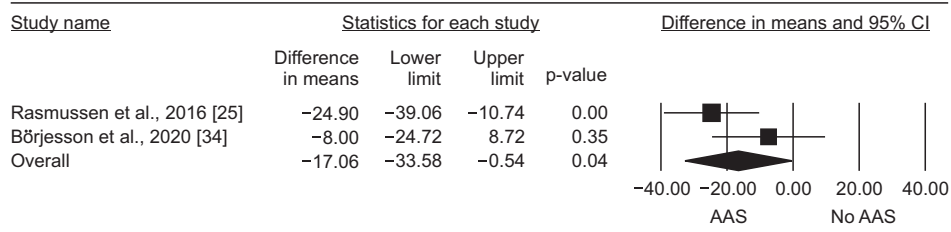

Supplement Fig. 1. Continued.
