# Supplementary material for: Consequences of Anabolic-Androgenic Steroid Abuse in Males; Sexual and Reproductive Perspective
Source: PubMed Central journal article supplement — World J Mens Health. 2021 Jun 1;40(2):165–78. doi: 10.5534/wjmh.210021 (PMC8987149; doi:10.5534/wjmh.210021), 2021-06-01
Supplement: wjmh-40-165-s002.pdf [file wjmh-40-165-s002.pdf]

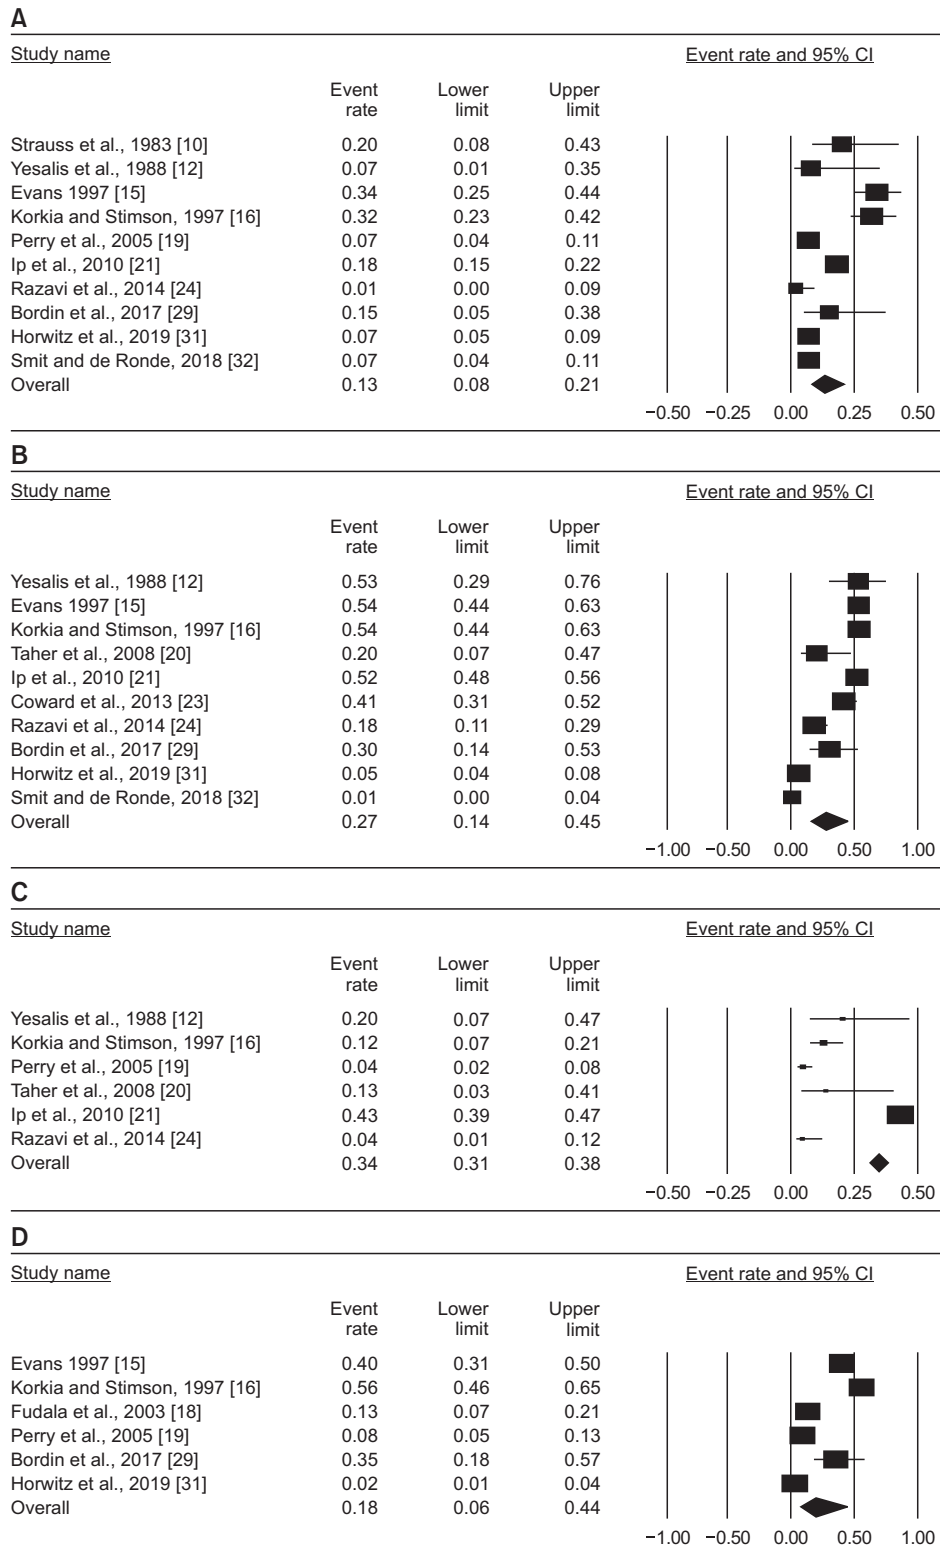

**Supplement Fig. 2.** Rate (95% confidence interval [CI]) of the main adverse events related to the abuse of anabolic androgen steroids (AAS): gynecomastia (A), acne (B), hair loss (C), reduced testis volume (D), elevated cholesterol (E), elevated blood pressure (F), erectile dysfunction (G), reduce libido (H).

**E**

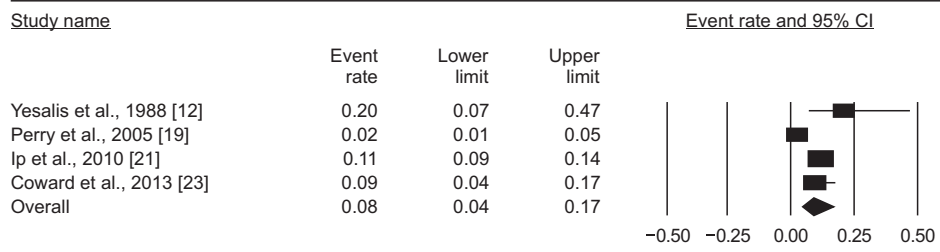

**F**

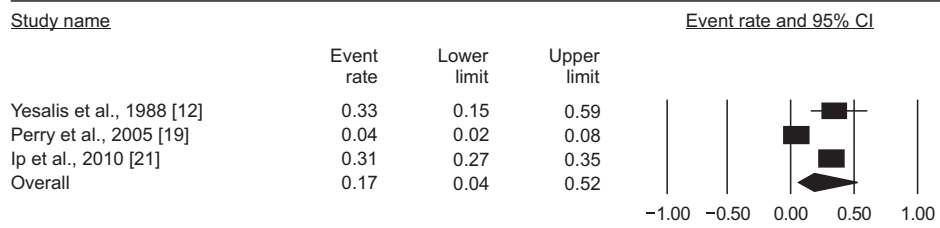

**G**

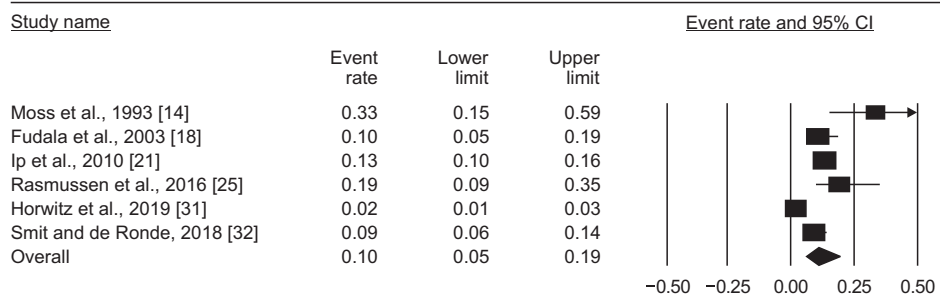

**H**

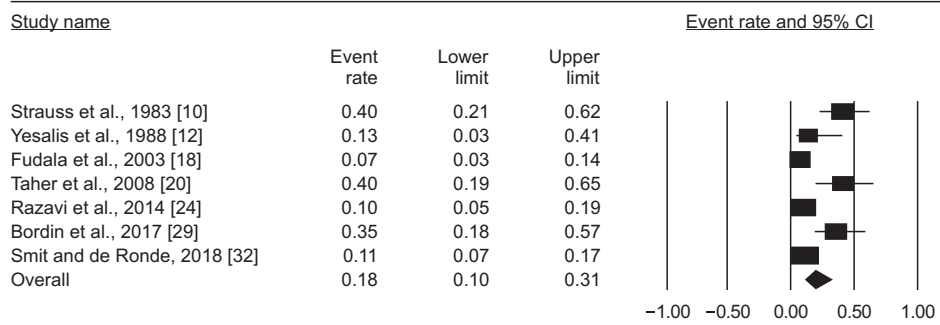

Supplement Fig. 2. Continued.
