# Supplementary material for: Consequences of Anabolic-Androgenic Steroid Abuse in Males; Sexual and Reproductive Perspective
Source: PubMed Central journal article supplement — World J Mens Health. 2021 Jun 1;40(2):165–78. doi: 10.5534/wjmh.210021 (PMC8987149; doi:10.5534/wjmh.210021), 2021-06-01
Supplement: wjmh-40-165-s004.pdf [file wjmh-40-165-s004.pdf]

**A**

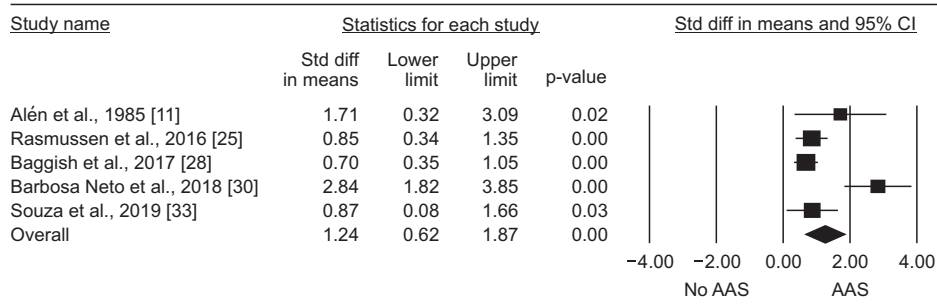

**B**

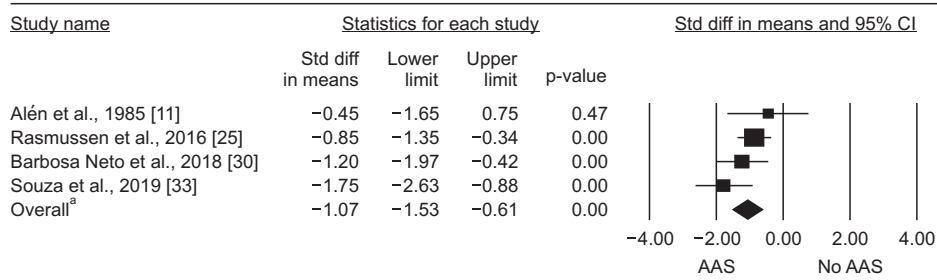

**C**

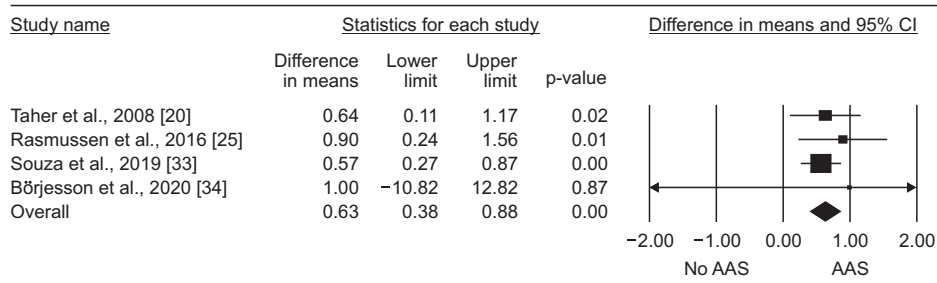

**D**

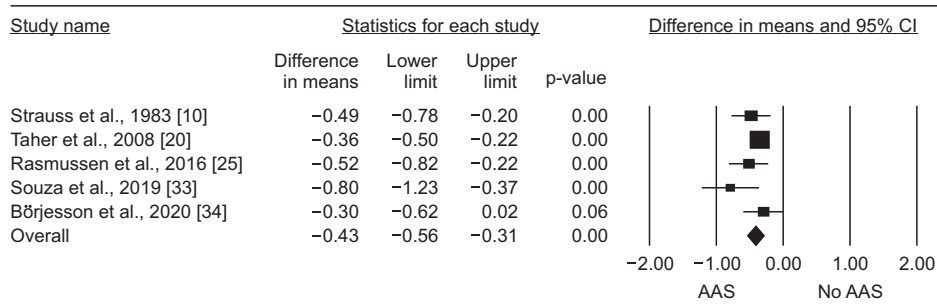

**Supplement Fig. 4.** Weighted differences (with 95% confidence interval [CI]) of lean mass (A), fat mass (B), low density lipoprotein-cholesterol (C; mmol/L), high density lipoprotein cholesterol (D; mmol/L), total cholesterol (E; mmol/L), triglycerides (F; mmol/L) and fasting glycaemia (G; mmol/L) in men using or not using anabolic androgen steroids (AAS). Data are reported as mean (95% CI). Std diff: standardized difference. <sup>a</sup>Standardized mean (95% CI).

**E**

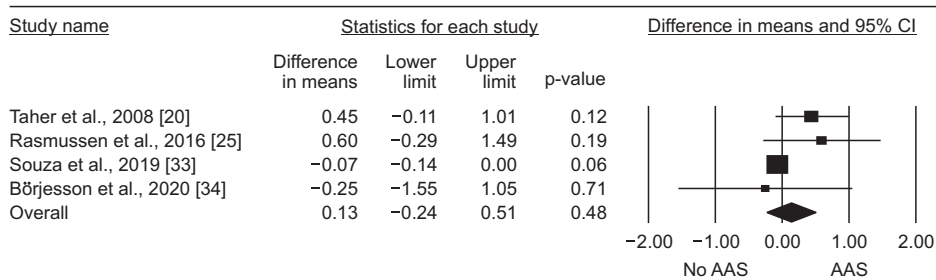

**F**

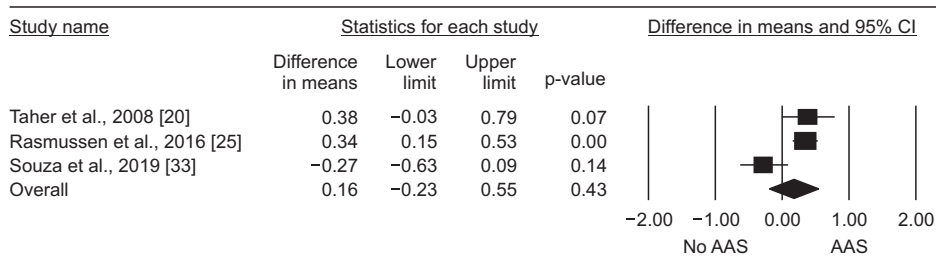

**G**

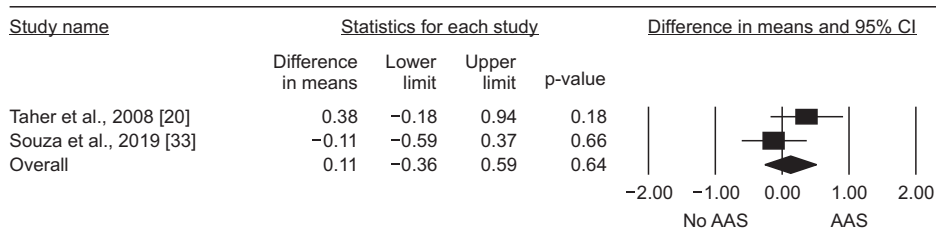

Supplement Fig. 4. Continued.
