# Supplementary material for: Consequences of Anabolic-Androgenic Steroid Abuse in Males; Sexual and Reproductive Perspective
Source: PubMed Central journal article supplement — World J Mens Health. 2021 Jun 1;40(2):165–78. doi: 10.5534/wjmh.210021 (PMC8987149; doi:10.5534/wjmh.210021), 2021-06-01
Supplement: wjmh-40-165-s005.pdf [file wjmh-40-165-s005.pdf]

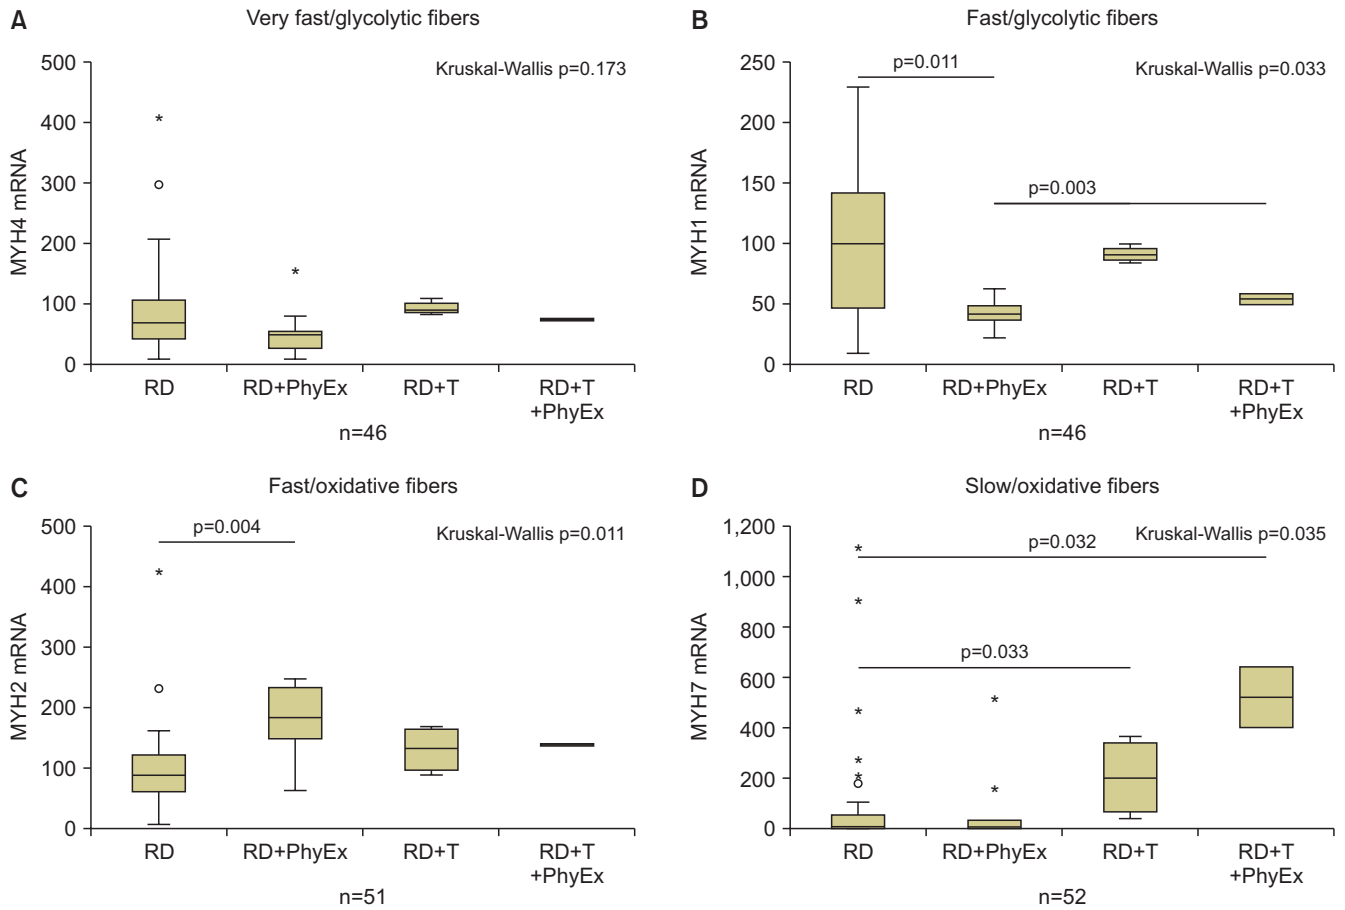

**Supplement Fig. 5.** Gene expression of the indicated markers of different muscular fibers (A) very fast/glycolytic fibers; (B) fast/glycolytic fibers; (C) fast/oxidative fibers; (D) slow/oxidative fibers) in eugonadal rabbits fed a regular diet (RD), which performed (RD+PhyEx) or not physical exercise. The effect of supraphysiological dosing with T is also showed in rabbits which performed physical exercise (RD+T+PhyEx) or not (RD+T). Level of significance upon Kruskal–Wallis and post-hoc Mann–Whitney analyses is also indicated, along with number of observations. \*Outlier.
