# Supplementary material for: Consequences of Anabolic-Androgenic Steroid Abuse in Males; Sexual and Reproductive Perspective
Source: PubMed Central journal article supplement — World J Mens Health. 2021 Jun 1;40(2):165–78. doi: 10.5534/wjmh.210021 (PMC8987149; doi:10.5534/wjmh.210021), 2021-06-01
Supplement: wjmh-40-165-s006.pdf [file wjmh-40-165-s006.pdf]

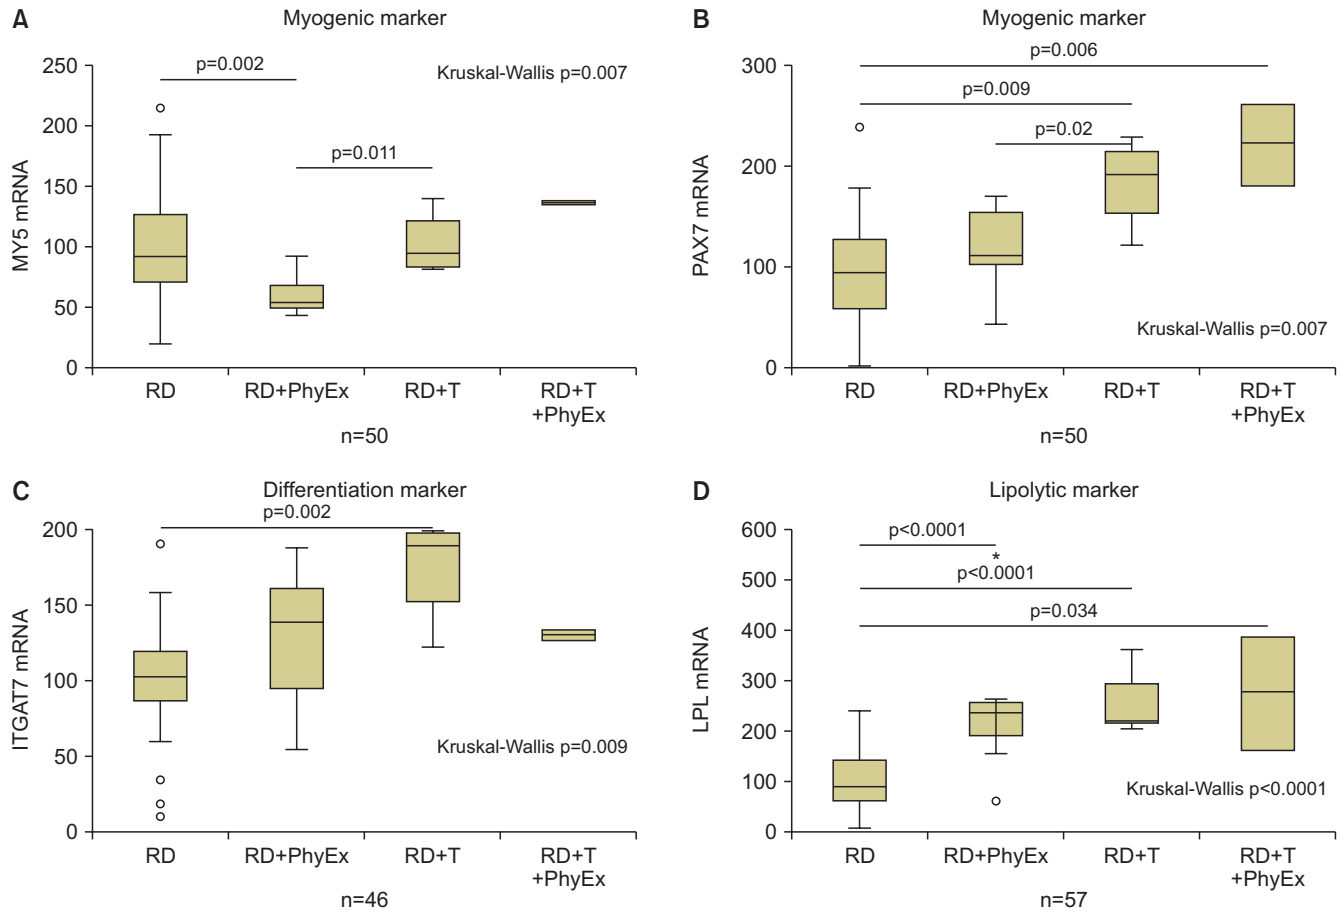

**Supplement Fig. 6.** Gene expression of the indicated myogenic (A, B) or differentiation muscle (C) markers in eugonadal rabbits fed a regular diet (RD), which performed (RD+PhyEx) or not physical exercise (PhyEx). The effect of supraphysiological dosing with testosterone (T) is also showed in rabbits which performed physical exercise (RD+T+PhyEx) or not (RD+T). Panel (D) shows results on lipoprotein lipase (LPL) mRNA, a lipolytic marker. Level of significance upon Kruskal–Wallis and post-hoc Mann–Whitney analyses is also indicated, along with number of observations. \*Outlier.
