# Supplementary material for: Consequences of Anabolic-Androgenic Steroid Abuse in Males; Sexual and Reproductive Perspective
Source: PubMed Central journal article supplement — World J Mens Health. 2021 Jun 1;40(2):165–78. doi: 10.5534/wjmh.210021 (PMC8987149; doi:10.5534/wjmh.210021), 2021-06-01
Supplement: wjmh-40-165-s007.pdf [file wjmh-40-165-s007.pdf]

Supplement Table 1. Parameters reported per single trial included in the meta-analysis

| Authors                                           | Adverse events |   |    |      |      | Hormonal parameters |    |     |    |     | Sperm parameters |    |      |    |    | Body composition and metabolic parameters |    |    |     |     |    |    |    |   |
|---------------------------------------------------|----------------|---|----|------|------|---------------------|----|-----|----|-----|------------------|----|------|----|----|-------------------------------------------|----|----|-----|-----|----|----|----|---|
|                                                   | G              | A | HL | ↓ TV | ↑ BP | ↑ C                 | ED | ↓ L | LH | FSH | TT               | E2 | SHBG | TS | SC | SM                                        | FM | LM | LDL | HDL | TC | TG | FG |   |
| Aakvaag and Stromme, 1974 [9] <sup>a</sup>        |                |   |    |      |      |                     |    |     |    |     |                  |    |      |    |    |                                           |    |    |     |     |    |    |    |   |
| Strauss et al., 1983 [10]                         |                |   |    |      |      |                     | X  |     |    |     |                  |    |      |    |    |                                           |    |    |     | X   |    |    |    |   |
| Alén et al., 1985 [11]                            | X              |   |    |      |      |                     |    | X   | X  | X   |                  |    |      | X  | X  | X                                         |    |    |     |     |    |    |    |   |
| Yesalis et al., 1988 [12]                         | X              | X | X  | X    | X    |                     |    |     |    |     |                  |    |      |    |    |                                           |    |    |     |     |    |    |    |   |
| Knuth et al., 1989 [13]                           |                |   |    |      |      |                     |    | X   | X  | X   |                  |    |      | X  |    |                                           |    |    |     |     |    |    |    |   |
| Moss et al., 1993 [14]                            |                |   |    |      |      |                     | X  |     |    |     |                  |    |      |    |    |                                           |    |    |     |     |    |    |    |   |
| Evans, 1997 [15]                                  | X              | X |    |      |      |                     |    |     |    |     |                  |    |      |    |    |                                           |    |    |     |     |    |    |    |   |
| Korkia and Stimson, 1997 [16]                     | X              | X | X  | X    | X    |                     |    |     |    |     |                  |    |      |    |    |                                           |    |    |     |     |    |    |    |   |
| Torres-Calleja et al., 2001 [17]                  |                |   |    |      |      |                     |    | X   | X  | X   |                  |    |      | X  |    | X                                         |    |    |     |     |    |    |    |   |
| Fudala et al., 2003 [18]                          |                |   |    |      |      |                     | X  |     |    |     |                  |    |      |    |    |                                           |    |    |     |     |    |    |    |   |
| Perry et al., 2005 [19]                           | X              |   | X  | X    | X    |                     |    |     |    |     |                  |    |      |    |    |                                           |    |    |     |     |    |    |    |   |
| Taher et al., 2008 [20]                           | X              | X | X  | X    | X    |                     |    | X   | X  | X   |                  |    |      |    |    |                                           |    |    |     |     |    |    |    | X |
| Ip et al., 2010 [21]                              | X              | X | X  | X    | X    |                     | X  |     |    |     |                  |    |      |    |    |                                           |    |    |     |     |    |    |    | X |
| Al-Janabi et al., 2011 [22]                       |                |   |    |      |      |                     |    |     |    |     |                  |    |      | X  | X  | X                                         |    |    |     |     |    |    |    |   |
| Coward et al., 2013 [23]                          | X              |   |    |      |      |                     | X  |     |    |     |                  |    |      |    |    |                                           |    |    |     |     |    |    |    |   |
| Razavi et al., 2014 [24]                          | X              |   | X  |      |      |                     |    |     |    |     |                  |    |      |    |    |                                           |    |    |     |     |    |    |    |   |
| Rasmussen et al., 2016 [25], 2017 [26], 2018 [27] |                |   |    |      |      |                     | X  |     | X  | X   |                  |    |      | X  |    |                                           |    |    |     |     |    |    |    | X |
| Baggish et al., 2017 [28]                         |                |   |    |      |      |                     |    |     |    |     |                  |    |      |    |    |                                           |    |    |     |     |    |    |    |   |
| Bordin et al., 2017 [29]                          | X              | X |    | X    |      |                     |    | X   |    | X   |                  |    |      |    |    |                                           |    |    |     |     |    |    |    |   |
| Barbosa Neto et al., 2018 [30]                    |                |   |    |      |      |                     |    |     | X  | X   |                  |    |      |    |    |                                           |    |    |     |     |    |    |    |   |
| Horwitz et al., 2019 [31]                         | X              | X |    | X    |      |                     | X  |     |    |     |                  |    |      |    |    |                                           |    |    |     |     |    |    |    |   |
| Smit and de Ronde, 2018 [32]                      | X              | X |    |      |      |                     | X  |     |    |     |                  |    |      |    |    |                                           |    |    |     |     |    |    |    |   |
| Souza et al., 2019 [33]                           |                |   |    |      |      |                     |    | X   | X  | X   |                  |    |      |    |    |                                           |    |    |     |     |    |    |    | X |
| Börjesson et al., 2020 [34]                       |                |   |    |      |      |                     |    |     |    |     |                  |    |      |    |    |                                           |    |    |     |     |    |    |    |   |
| Aakvaag and Stromme, 1974 [9] <sup>a</sup>        | X              |   |    |      |      |                     | X  |     | X  | X   |                  |    |      | X  |    |                                           |    |    |     |     |    |    |    |   |
| Strauss et al., 1983 [10]                         | X              | X | X  | X    | X    |                     |    | X   | X  | X   |                  |    |      |    |    |                                           |    |    |     |     |    |    |    |   |
| Alén et al., 1985 [11]                            |                |   |    |      |      |                     |    | X   | X  | X   |                  |    |      |    |    |                                           |    |    |     |     |    |    |    | X |
| Yesalis et al., 1988 [12]                         | X              | X |    | X    |      |                     | X  |     |    |     |                  |    |      |    |    |                                           |    |    |     |     |    |    |    |   |
| Knuth et al., 1989 [13]                           | X              | X | X  | X    | X    |                     |    | X   | X  | X   |                  |    |      | X  |    |                                           |    |    |     |     |    |    |    |   |
| Moss et al., 1993 [14]                            | X              | X | X  | X    | X    |                     |    |     |    |     |                  |    |      |    |    |                                           |    |    |     |     |    |    |    |   |
| Evans, 1997 [15]                                  |                |   |    |      |      |                     |    |     |    |     |                  |    |      |    |    |                                           |    |    |     |     |    |    |    |   |
| Korkia and Stimson, 1997 [16]                     |                |   |    | X    |      |                     | X  |     |    |     |                  |    |      |    |    |                                           |    |    |     |     |    |    |    |   |
| Torres-Calleja et al., 2001 [17]                  | X              | X | X  | X    | X    |                     | X  |     | X  | X   |                  |    |      | X  |    |                                           |    |    |     |     |    |    |    |   |
| Fudala et al., 2003 [18]                          | X              | X | X  | X    | X    |                     |    | X   | X  | X   |                  |    |      |    |    |                                           |    |    |     |     |    |    |    |   |

**Supplement Table 1.** Parameters reported per single trial included in the meta-analysis

| Authors                                           | Adverse events |   |    |      |      | Hormonal parameters |    |     |    |     | Sperm parameters |    |      |    |    | Body composition and metabolic parameters |    |    |     |     |    |    |    |
|---------------------------------------------------|----------------|---|----|------|------|---------------------|----|-----|----|-----|------------------|----|------|----|----|-------------------------------------------|----|----|-----|-----|----|----|----|
|                                                   | G              | A | HL | ↓ TV | ↑ BP | ↑ C                 | ED | ↓ L | LH | FSH | TT               | E2 | SHBG | TS | SC | SM                                        | FM | LM | LDL | HDL | TC | TG | FG |
| Perry et al., 2005 [19]                           | x              | x | x  | x    | x    | x                   | x  | x   |    |     |                  |    |      |    |    |                                           |    |    |     |     |    | x  | x  |
| Taher et al., 2008 [20]                           |                |   |    |      |      |                     |    | x   | x  | x   |                  |    |      |    |    |                                           |    |    | x   | x   |    |    |    |
| Ip et al., 2010 [21]                              | x              |   |    |      | x    |                     |    |     |    |     |                  |    |      |    |    |                                           |    |    |     |     |    |    |    |
| Al-Janabi et al., 2011 [22]                       | x              |   | x  |      |      |                     | x  |     |    |     |                  |    |      | x  | x  | x                                         |    |    |     |     |    |    |    |
| Coward et al., 2013 [23]                          |                |   |    |      |      |                     | x  |     |    |     |                  |    |      |    |    |                                           |    |    |     |     |    |    |    |
| Razavi et al., 2014 [24]                          |                |   |    |      |      |                     |    |     |    |     |                  | x  |      |    |    |                                           |    |    |     |     |    |    |    |
| Rasmussen et al., 2016 [25], 2017 [26], 2018 [27] | x              | x |    | x    |      |                     |    | x   | x  | x   |                  |    | x    |    |    |                                           | x  | x  | x   | x   |    |    | x  |
| Baggish et al., 2017 [28]                         |                |   |    |      |      |                     | x  |     |    |     |                  |    |      |    |    |                                           |    |    |     |     |    |    |    |
| Bordin et al., 2017 [29]                          | x              | x |    | x    |      |                     | x  |     |    | x   |                  |    |      |    |    |                                           |    |    |     |     |    |    |    |
| Barbosa Neto et al., 2018 [30]                    | x              | x |    |      |      |                     | x  |     | x  | x   |                  |    |      |    |    |                                           |    |    |     |     |    |    |    |
| Horwitz et al., 2019 [31]                         |                |   |    |      |      |                     | x  |     |    |     |                  |    |      |    |    |                                           |    |    |     |     |    |    |    |
| Smit and de Ronde, 2018 [32]                      |                |   |    |      |      |                     |    |     |    |     |                  |    |      |    |    |                                           |    |    |     |     |    |    | x  |
| Souza et al., 2019 [33]                           | x              |   |    |      |      |                     |    | x   | x  | x   |                  |    |      |    |    |                                           | x  | x  | x   | x   |    |    |    |
| Börjesson et al., 2020 [34]                       | x              | x | x  | x    | x    | x                   | x  | x   | x  | x   | x                | x  | x    |    |    |                                           |    |    |     |     |    |    |    |

G: gynecomastia, A: acne, HL: hair loss, ↓ TV: reduced testis volume, ↑ BP: increased blood pressure, ↑ C: increased cholesterol, ED: erectile dysfunction, ↓ L: reduced libido, LH: luteinizing hormone, FSH: follicular stimulating hormone, TT: total testosterone, E2: estradiol, SHBG: sex hormone binding globuline, TS: total sperm count, SC: sperm concentration, SM: sperm morphology, FM: fat mass, LM: lean mass, LDL: low-density lipoprotein cholesterol, HDL: high-density lipoprotein cholesterol, TC: total cholesterol, TG: triglycerides, FG: fasting glucose.

<sup>a</sup>Randomized controlled trial.
